# Supplementary material for: Nanocomposites with BaTiO3–SrTiO3 hybrid fillers exhibiting enhanced dielectric behaviours and energy-storage densities
Source: Royal Society of Chemistry journal article supplement (doi:10.1039/c4tc02972k), 2015-01-01
Supplement: c4tc02972k1.pdf [file c4tc02972k1.pdf]

Electronic Supplementary Information

**Nanocomposites with BaTiO<sub>3</sub>/SrTiO<sub>3</sub> hybrid fillers exhibiting enhanced dielectric behaviours and energy-storage densities**

Dan Yu<sup>a</sup>, Nuo-xin Xu<sup>a</sup>, Liang Hu<sup>a</sup>, Qi-long Zhang<sup>\*a</sup> and Hui Yang<sup>a, b</sup>

<sup>a</sup>College of Materials Science and Engineering, Zhejiang University, Hangzhou 310027, China

<sup>b</sup>Zhejiang California International NanoSystems Institute, Zhejiang University, Hangzhou 310058, China

\* Corresponding author. E-mail: mse237@zju.edu.cn

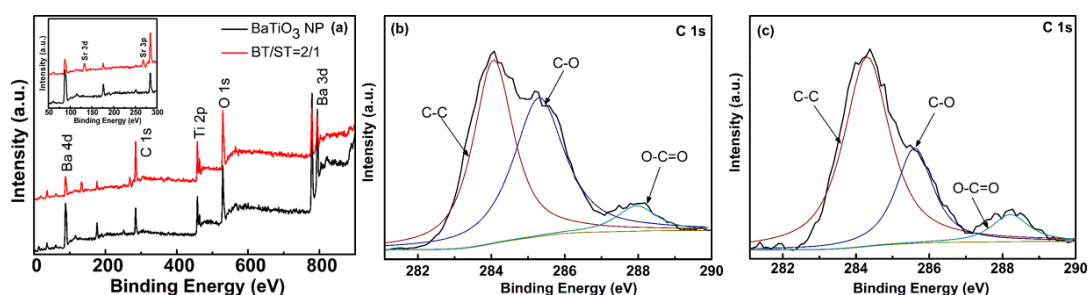

**Fig. S1** XPS spectra of (a) BT NPs and the as-synthesized BT/ST (BT/ST=2/1) compounds Inset: enlarged view of Sr- peaks (b) C 1s spectrum of functionalized BT NPs (c) C 1s spectrum of the BT/ST compounds (BT/ST=2/1)

**Table S1**  $T_c$  of P(VDF-HFP) and the nanocomposites

| sample    | P(VDF-HFP) | BaTiO <sub>3</sub> -PHF | SrTiO <sub>3</sub> -PHF | BT/ST=2/1-PHF | BT/ST=1/1-PHF | BT/ST=1/4-PHF |
|-----------|------------|-------------------------|-------------------------|---------------|---------------|---------------|
| $T_c$ /°C | 154.16     | 154.45                  | 155.02                  | 155.97        | 155.30        | 153.31        |

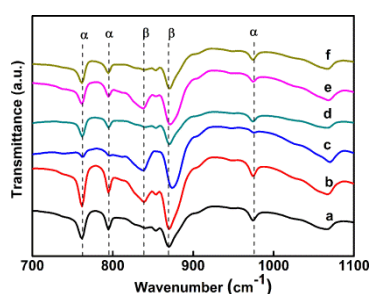

**Fig. S2** FT-IR spectra of P(VDF-HFP) and the as-synthesized nanocomposites (a) P(VDF-HFP) (b) BaTiO<sub>3</sub>-NP-PHF (c) SrTiO<sub>3</sub>-NW-PHF (d) BT/ST=2/1-PHF (e) BT/ST=1/1-PHF (f) BT/ST=1/4-PHF, all nanocomposites are 7.5 vol%

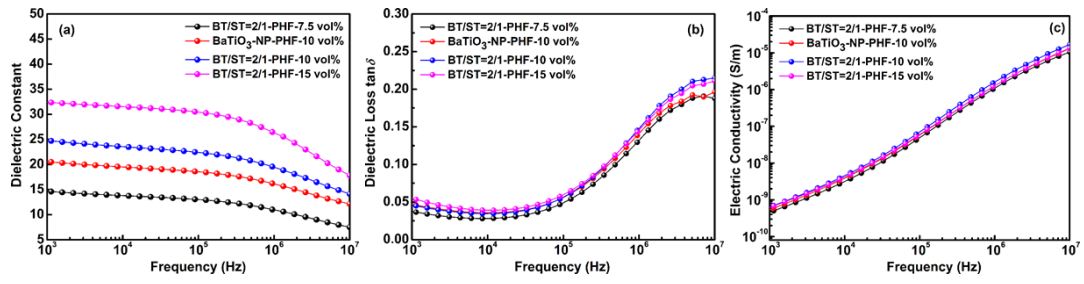

**Fig. S3** Frequency dependence of dielectric parameters for the nanocomposites with different volume fraction (BT/ST=2/1) (a) dielectric constant (b) dielectric loss tangent (c) electric conductivity
